# Supplementary material for: Measuring health-related quality of life in chronic otitis media in a Chinese population: cultural adaption and validation of the Zurich Chronic Middle Ear Inventory (ZCMEI-21-Chn)
Source: Springer Nature journal article supplement (doi:10.1186/s12955-020-01461-6), 2020-07-08
Supplement: MOESM1 [file 18159552]

---

|                        | 听力很好                  | 基本没问题                 | 有时听不清                 | 经常听不清                 | 一直听不清                 |
|------------------------|-----------------------|-----------------------|-----------------------|-----------------------|-----------------------|
| 8. 我在嘈杂环境中也能听清并理解别人说的话 | <input type="radio"/> | <input type="radio"/> | <input type="radio"/> | <input type="radio"/> | <input type="radio"/> |
| 9. 我接听电话和听清闹钟没有问题      | <input type="radio"/> | <input type="radio"/> | <input type="radio"/> | <input type="radio"/> | <input type="radio"/> |

---

|                                                      | 完全不符合                 | 不太符合                  | 部分符合                  | 基本符合                  | 完全符合                  |
|------------------------------------------------------|-----------------------|-----------------------|-----------------------|-----------------------|-----------------------|
| 10. 我时常担心无法理解他人说的话                                   | <input type="radio"/> | <input type="radio"/> | <input type="radio"/> | <input type="radio"/> | <input type="radio"/> |
| 11. 耳朵的症状给我造成了不小的心理负担（例如耳痛、耳中流出液体、耳闷堵感、听力下降、耳鸣或/及其他） | <input type="radio"/> | <input type="radio"/> | <input type="radio"/> | <input type="radio"/> | <input type="radio"/> |
| 12. 耳朵的问题导致我和家人交谈减少                                  | <input type="radio"/> | <input type="radio"/> | <input type="radio"/> | <input type="radio"/> | <input type="radio"/> |
| 13. 由于耳朵的问题，我在上学/工作、或在其他公共场合活动（例如购物）都受到限制            | <input type="radio"/> | <input type="radio"/> | <input type="radio"/> | <input type="radio"/> | <input type="radio"/> |
| 14. 耳朵的问题影响我同他人的交往                                   | <input type="radio"/> | <input type="radio"/> | <input type="radio"/> | <input type="radio"/> | <input type="radio"/> |
| 15. 耳朵的问题影响我的睡眠质量                                    | <input type="radio"/> | <input type="radio"/> | <input type="radio"/> | <input type="radio"/> | <input type="radio"/> |
| 16. 耳朵的问题让我情绪低落                                      | <input type="radio"/> | <input type="radio"/> | <input type="radio"/> | <input type="radio"/> | <input type="radio"/> |
| 17. 我担心耳朵的问题以后也无法改善                                  | <input type="radio"/> | <input type="radio"/> | <input type="radio"/> | <input type="radio"/> | <input type="radio"/> |

---

|                                                                 | 没有不便                  | 稍有不便                  | 较为不便                  | 很不方便                  | 非常不便                  |
|-----------------------------------------------------------------|-----------------------|-----------------------|-----------------------|-----------------------|-----------------------|
| 18. 请问防止耳朵进水是否为您带来很大的不便?<br>如果您不需要防止耳朵进水, 请选择“没有不便”             | <input type="radio"/> | <input type="radio"/> | <input type="radio"/> | <input type="radio"/> | <input type="radio"/> |
|                                                                 | 1 次                   | 2-3 次                 | 4-7 次                 | 8-15 次                | 16 次及以上               |
| 19. 在过去的 6 个月中, 您因为耳朵问题去就医的次数?                                  | <input type="radio"/> | <input type="radio"/> | <input type="radio"/> | <input type="radio"/> | <input type="radio"/> |
|                                                                 | 没有使用                  | 数天                    | 数周                    | 数月                    | 一直在用                  |
| 20. 您在过去的 6 个月中, 因为耳部疾病使用抗菌药物 (头<br>孢、克拉霉素、阿莫西林、阿奇霉素等) 治疗的总时长为? | <input type="radio"/> | <input type="radio"/> | <input type="radio"/> | <input type="radio"/> | <input type="radio"/> |
| 21. 您在过去的 6 个月中, 因为耳部疾病使用滴耳液的总时长<br>为?                          | <input type="radio"/> | <input type="radio"/> | <input type="radio"/> | <input type="radio"/> | <input type="radio"/> |
